# Supplementary material
Source: publisher site journal article supplement (https://www.dovepress.com/get_supplementary_file.php?f=362116.docx)
Supplement: Supplementary file 1 [file get_supplementary_file.php]

**Supplementary materials**

**Table S1** Distribution of score with diagnostic cut-off performance

| **Cut point** | **Sensitivity (%)** | **Specificity (%)** | **LR+** | **LR-** |
| --- | --- | --- | --- | --- |
| 9 | 91.3 | 47.7 | 1.74 | 0.18 |
| 10 | 80.4 | 51.2 | 1.65 | 0.38 |
| 12 | 78.3 | 58.1 | 1.87 | 0.37 |
| 13 | 69.6 | 75.6 | 2.85 | 0.40 |
| 14 | 63.0 | 84.9 | 4.17 | 0.44 |
| 15 | 47.8 | 87.2 | 3.74 | 0.60 |

**Figure S1** Calibration plot of prediction model performance


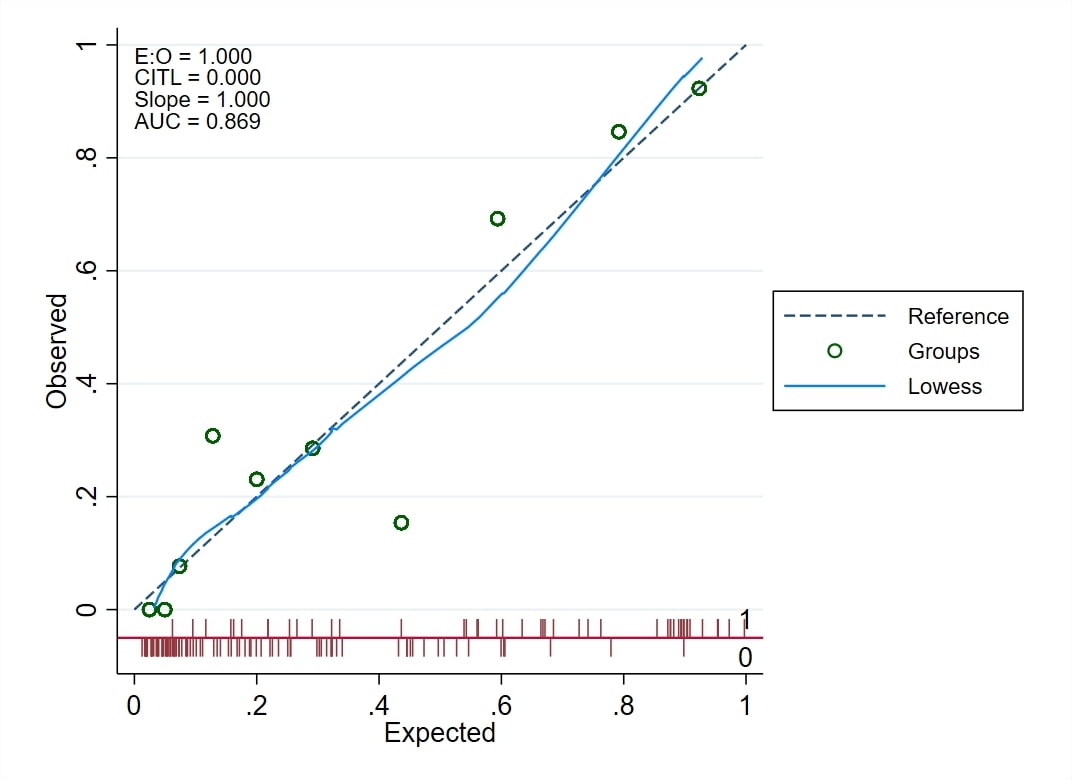


**Figure Legend:** Pmcalplot includes lowess smoother, risk score distribution, and agreement in tenths of risk type.
